# Supplementary material
Source: publisher figshare collection journal article supplement (https://acs.figshare.com/ndownloader/files/13239128)
Supplement: Supplementary file 1 [file 13239128]

**Supporting Information For**  
***Pyridyl-Directed C-H and C-Br Bond Activations Promoted by***  
***Dimer Iridium-Olefin Complexes***

*Pierre-Luc T. Boudreault,<sup>†</sup> Miguel A. Esteruelas,<sup>\*,‡</sup> Erik Mora,<sup>‡</sup> Enrique Oñate,<sup>‡</sup> and  
Jui-Yi Tsai<sup>†</sup>*

<sup>‡</sup>Departamento de Química Inorgánica, Instituto de Síntesis Química y Catálisis  
Homogénea (ISQCH), Centro de Innovación en Química Avanzada (ORFEO-CINQA),  
Universidad de Zaragoza-CSIC, 50009 Zaragoza, Spain

<sup>†</sup>Universal Display Corporation, 375 Phillips Boulevard, Ewing, New Jersey 08618,  
United States

\*Corresponding author's e-mail address: [maester@unizar.es](mailto:maester@unizar.es)

## CONTENTS

|                                                                                                    |                |
|----------------------------------------------------------------------------------------------------|----------------|
| <b>Instrumental methods</b>                                                                        | <b>S3</b>      |
| <b>ORTEP Diagram for complexes 11 and 12.</b>                                                      | <b>S4</b>      |
| <b>7Structural Analysis of Complexes 5, 6, 9, 10, 11 and 12.</b>                                   | <b>S5-S7</b>   |
| <b>MALDI-TOF spectrums for complexes 3 and 5</b>                                                   | <b>S8</b>      |
| <b>MALDI-TOF of the fragments of the reaction of 1 with<br/>2-(2-bromophenyl)pyridine at 135°C</b> | <b>S9-S10</b>  |
| <b><sup>1</sup>H-NMR and for complex 5</b>                                                         | <b>S11</b>     |
| <b><sup>1</sup>H-NMR and <sup>13</sup>C{<sup>1</sup>H} APT NMR for complex 6</b>                   | <b>S12-S13</b> |
| <b><sup>1</sup>H-NMR and <sup>13</sup>C{<sup>1</sup>H} APT NMR for complex 8</b>                   | <b>S14-S15</b> |
| <b><sup>1</sup>H-NMR and <sup>13</sup>C{<sup>1</sup>H} APT NMR for complex 9</b>                   | <b>S16-S17</b> |
| <b><sup>1</sup>H-NMR and <sup>13</sup>C{<sup>1</sup>H} APT NMR for complex 10</b>                  | <b>S18-S19</b> |
| <b><sup>1</sup>H-NMR and <sup>13</sup>C{<sup>1</sup>H} APT NMR for complex 11</b>                  | <b>S20-S21</b> |
| <b><sup>1</sup>H-NMR and <sup>13</sup>C{<sup>1</sup>H} APT NMR for complex 12</b>                  | <b>S22-S23</b> |
| <b><sup>1</sup>H-NMR and <sup>13</sup>C{<sup>1</sup>H} APT NMR for complex 13</b>                  | <b>S24-S25</b> |
| <b>References</b>                                                                                  | <b>S26</b>     |

**Instrumental methods.** Solvents were dried using standard procedures and distilled under argon atmosphere or obtained dry from an MBraun solvent purification apparatus. NMR spectra were recorded on either a Bruker Avance 300 MHz or 400 MHz instrument. Signals were assigned using also bidimensional NMR experiments ( $^1\text{H}$ - $^1\text{H}$  COSY,  $^1\text{H}$ - $^{13}\text{C}\{^1\text{H}\}$  HMBC and  $^1\text{H}$ - $^{13}\text{C}\{^1\text{H}\}$  HSQC). Elemental analyses were carried out using a Perkin-Elmer 2400 CHNS/O analyzer, and IR spectra were measured using a PerkinElmer Spectrum 100 FT-IR spectrometer, equipped with an ATR accessory, as pure solids. High-resolution electrospray mass spectra were acquired using a MicroTOF-Q hybrid quadrupole time-of-flight spectrometer (Bruker Daltonics, Bremen, Germany). MALDI-TOF mass spectra were acquired using a Bruker Autoflex III, MALDI-TOF/TOF equipped with a DCTB matrix.

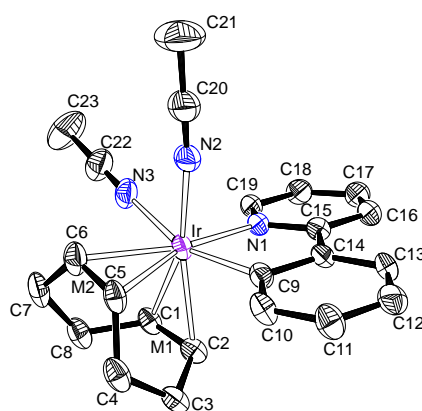

**Figure S1.** ORTEP diagram of complex **11** (50% probability ellipsoids). Hydrogen atoms are omitted for clarity. Selected bond lengths (Å) and angles (deg): Ir-N(1) = 2.077(4), Ir-N(2) = 2.044(5), Ir-N(3) = 2.132(6), Ir-C(9) = 2.078(6), Ir-C(1) = 2.195(6), Ir-C(2) = 2.215(6), Ir-C(5) = 2.256(6), Ir-C(6) = 2.265(6), N(3)-Ir-C(9) = 160.7(2), N(2)-Ir-M(1) = 175.5(2), N(1)-Ir-M(2) = 176.8(2).

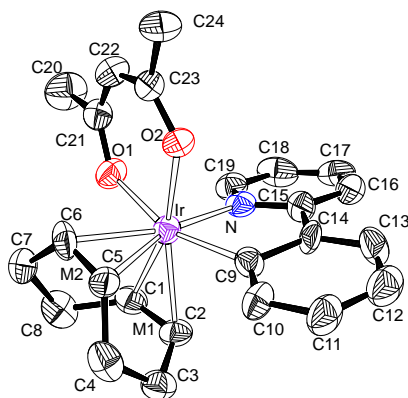

**Figure S2.** **12** crystallizes with two chemically equivalent molecules in the asymmetric unit. ORTEP of complex **12** (50% probability ellipsoids). Hydrogen atoms are omitted for clarity. Selected bond lengths (Å) and angles (deg): Ir-N = 2.082(10), 2.059(11), Ir-O(2) = 2.068(8), 2.062(9), Ir-O(1) = 2.139(9), 2.137(9), Ir-C(9) = 2.068(13), 2.077(13), Ir-C(1) = 2.185(13), 2.171(13), Ir-C(2) = 2.218(13), 2.210(12), Ir-C(5) = 2.236(13), 2.240(14), Ir-C(6) = 2.193(13), 2.205(13), O(1)- Ir-C(9) = 160.0(4), 159.9(4), O(2)- Ir-M(1) = 174.7(5), 174.3(5), N-Ir-M(2) = 177.3(5), 177.1(5).

**Structural Analysis of Complexes 5, 6, 9, 10, 11 and 12.** X-ray data were collected for the complexes on a Bruker Smart APEX and Bruker Smart APEX DUO diffractometer equipped with a normal focus, and 2.4 kW sealed tube source (Mo radiation,  $\lambda = 0.71073$  Å). Data were collected over the complete sphere covering  $0.3^\circ$  in  $\omega$ . Data were corrected for absorption by using a multiscan method applied with the SADABS program.<sup>1</sup> The structures were solved by Patterson or direct methods and refined by full-matrix least squares on  $F^2$  with SHELXL2016,<sup>2</sup> including isotropic and subsequently anisotropic displacement parameters. The hydrogen atoms were observed in the least Fourier Maps or calculated, and refined freely or using a restricted riding model. The disordered molecules were refined with different moieties, restrained geometries, and complementary occupancy factors.

Complex **5** has two bromophenyl-pyridine ( $\text{C}_6\text{H}_3\text{Br-py}$ ) and an acac ligands so the molecule has a symmetry axis  $\text{C}_2$  over the iridium atom and crystallizes in the monoclinic  $\text{C}2/\text{c}$  space system ( $Z'=0.5$ ). Complex **6** has a very similar structure with one bromophenyl-pyridine ( $\text{C}_6\text{H}_4\text{-py}$ ), one pyridine ( $\text{C}_6\text{H}_3\text{Br-py}$ ) and one acac ligands. This molecule lacks any kind of symmetry but crystallizes in a unit cell similar to **5** with two possible space groups  $\text{C}2/\text{c}$  ( $Z'=0.5$ ) or  $\text{Cc}$  ( $Z'=1$ ). Two alternative refinements were performed. One with the symmetric  $\text{C}2/\text{c}$  space system with occupancy 0.5 in the bromine position, and other in the asymmetric  $\text{Cc}$  space group with the bromine atoms in two positions with final occupancies 0.88/0.12. The refinement in the asymmetric space group was more consistent and then selected (agreement factors, positive and negative residuals...).

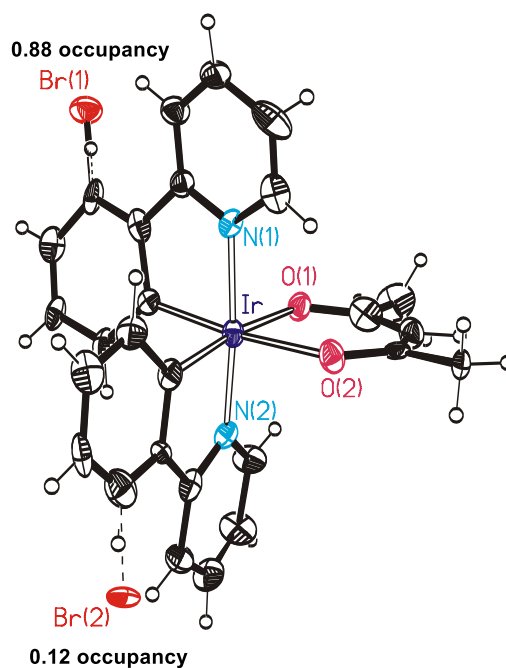

**Figure S3.** ORTEP of complex **6**.

Crystal data for **5**:  $\text{C}_{27}\text{H}_{21}\text{Br}_2\text{IrN}_2\text{O}_2$ ,  $M_w$  757.48, yellow, irregular block ( $0.252 \times 0.024 \times 0.023 \text{ mm}^3$ ), monoclinic, space group  $\text{C}2/\text{c}$ ,  $a$ :  $12.506(2) \text{ \AA}$ ,  $b$ :  $26.238(5) \text{ \AA}$ ,  $c$ :  $7.2648(13) \text{ \AA}$ ,  $\beta$ :  $100.937(2)^\circ$ ,  $V = 2340.4(7) \text{ \AA}^3$ ,  $Z = 4$ ,  $Z' = 0.5$ ,  $D_{\text{calc}}$ :  $2.150 \text{ g cm}^{-3}$ ,

F(000): 1440,  $T = 100(2)$  K,  $m$  9.148 mm<sup>-1</sup>. 10195 measured reflections ( $2\theta$ : 3-57°,  $w$  scans 0.3°), 2797 unique ( $R_{\text{int}} = 0.0743$ ); min./max. transm. Factors 0.627/0.862. Final agreement factors were  $R^1 = 0.0517$  (2236 observed reflections,  $I > 2s(I)$ ) and  $wR^2 = 0.1220$ ; data/restraints/parameters 2797/0/156; GoF = 1.091. Largest peak and hole 1.728 (close to iridium atoms) and -2.165 e/ Å<sup>3</sup>.

Crystal data for **6**: C<sub>27</sub>H<sub>22</sub>BrIrN<sub>2</sub>O<sub>2</sub>,  $M_w$  678.57, yellow, irregular block (0.289 x 0.055 x 0.048 mm<sup>3</sup>), monoclinic, space group Cc,  $a$ : 12.050(2) Å,  $b$ : 26.622(5) Å,  $c$ : 7.2732(12) Å,  $\beta$ : 103.606(2)°,  $V = 2267.8(7)$  Å<sup>3</sup>,  $Z = 4$ ,  $Z' = 1$ ,  $D_{\text{calc}}$ : 1.987 g cm<sup>-3</sup>, F(000): 1304,  $T = 100(2)$  K,  $m$  7.678 mm<sup>-1</sup>. 19588 measured reflections ( $2\theta$ : 3-57°,  $w$  scans 0.3°), 4848 unique ( $R_{\text{int}} = 0.0414$ ); min./max. transm. Factors 0.546/0.862. Final agreement factors were  $R^1 = 0.0375$  (4302 observed reflections,  $I > 2s(I)$ ) and  $wR^2 = 0.0965$ ; data/restraints/parameters 4848/3/310; GoF = 1.042. Largest peak and hole 2.210 (close to iridium atoms) and -2.522 e/ Å<sup>3</sup>.

Crystal data for **9**: C<sub>19</sub>H<sub>20</sub>BrClIrN,  $M_w$  569.92, colourless, irregular block (0.155 x 0.142 x 0.107 mm<sup>3</sup>), monoclinic, space group P2<sub>1</sub>/c,  $a$ : 8.5359(4) Å,  $b$ : 12.9219(7) Å,  $c$ : 15.7951(8) Å,  $\beta$ : 104.5600(10)°,  $V = 1686.25(15)$  Å<sup>3</sup>,  $Z = 4$ ,  $Z' = 1$ ,  $D_{\text{calc}}$ : 2.245 g cm<sup>-3</sup>, F(000): 1080,  $T = 100(2)$  K,  $m$  10.444 mm<sup>-1</sup>. 16452 measured reflections ( $2\theta$ : 3-57°,  $w$  scans 0.3°), 4078 unique ( $R_{\text{int}} = 0.0267$ ); min./max. transm. Factors 0.603/0.862. Final agreement factors were  $R^1 = 0.0199$  (3721 observed reflections,  $I > 2s(I)$ ) and  $wR^2 = 0.0467$ ; data/restraints/parameters 4078/0/220; GoF = 1.041. Largest peak and hole 1.456 (close to iridium atoms) and -0.668 e/ Å<sup>3</sup>.

Crystal data for **10**: C<sub>29</sub>H<sub>34</sub>IrNO<sub>4</sub>,  $M_w$  652.77, yellow, irregular block (0.234 x 0.091 x 0.055 mm<sup>3</sup>), monoclinic, space group P2<sub>1</sub>/n,  $a$ : 9.4133(5) Å,  $b$ : 20.0386(12) Å,  $c$ : 13.5666(8) Å,  $\beta$ : 94.6470(10)°,  $V = 2550.6(3)$  Å<sup>3</sup>,  $Z = 4$ ,  $Z' = 1$ ,  $D_{\text{calc}}$ : 1.700 g cm<sup>-3</sup>, F(000):

1296,  $T = 100(2)$  K,  $m$  5.270 mm<sup>-1</sup>. 44848 measured reflections ( $2\theta$ : 3-57°,  $w$  scans 0.3°), 6285 unique ( $R_{\text{int}} = 0.0349$ ); min./max. transm. Factors 0.560/0.862. Final agreement factors were  $R^1 = 0.0193$  (5545 observed reflections,  $I > 2s(I)$ ) and  $wR^2 = 0.0439$ ; data/restraints/parameters 6285/0/332; GoF = 1.040. Largest peak and hole 1.052 (close to iridium atoms) and -0.508 e/ Å<sup>3</sup>.

Crystal data for **11**: C<sub>23</sub>H<sub>26</sub>IrN<sub>3</sub>, 2(BF<sub>4</sub>), 1.2(CH<sub>2</sub>Cl<sub>2</sub>),  $M_w$  812.20, colourless, irregular block (0.168 x 0.120 x 0.100 mm<sup>3</sup>), monoclinic, space group C2/c,  $a$ : 18.7877(10) Å,  $b$ : 10.7248(6) Å,  $c$ : 31.060(2) Å,  $\beta$ : 103.5140(10)°,  $V = v$  Å<sup>3</sup>,  $Z = 8$ ,  $Z' = 1$ ,  $D_{\text{calc}}$ : 1.773 g cm<sup>-3</sup>,  $F(000)$ : 3155,  $T = 100(2)$  K,  $m$  4.668 mm<sup>-1</sup>. 42894 measured reflections ( $2\theta$ : 3-57°,  $w$  scans 0.3°), 7401 unique ( $R_{\text{int}} = 0.0526$ ); min./max. transm. Factors 0.713/0.862. Final agreement factors were  $R^1 = 0.0441$  (5917 observed reflections,  $I > 2s(I)$ ) and  $wR^2 = 0.1165$ ; data/restraints/parameters 7401/29/366; GoF = 1.038. Largest peak and hole 1.944 (close to iridium atoms) and -1.838 e/ Å<sup>3</sup>.

Crystal data for **12**: C<sub>24</sub>H<sub>27</sub>IrNO<sub>2</sub>, BF<sub>4</sub>, 0.5(C<sub>4</sub>H<sub>10</sub>O),  $M_w$  677.53, brown, irregular block (0.126 x 0.124 x 0.100 mm<sup>3</sup>), hexagonal, space group P6/5,  $a$ : 10.9926(6) Å,  $b$ : 10.9926(6) Å,  $c$ : 72.259(4) Å,  $V = 7561.7(9)$  Å<sup>3</sup>,  $Z = 12$ ,  $Z' = 2$ ,  $D_{\text{calc}}$ : 1.785 g cm<sup>-3</sup>,  $F(000)$ : 3996,  $T = 100(2)$  K,  $m$  5.353 mm<sup>-1</sup>. 136315 measured reflections ( $2\theta$ : 3-57°,  $w$  scans 0.3°), 12694 unique ( $R_{\text{int}} = 0.1186$ ); min./max. transm. Factors 0.687/0.862. Final agreement factors were  $R^1 = 0.0507$  (10006 observed reflections,  $I > 2s(I)$ ) and  $wR^2 = 0.0824$ ; data/restraints/parameters 12694/45/646; GoF = 1.073. Largest peak and hole 0.850 (close to iridium atoms) and -0.952 e/ Å<sup>3</sup>.

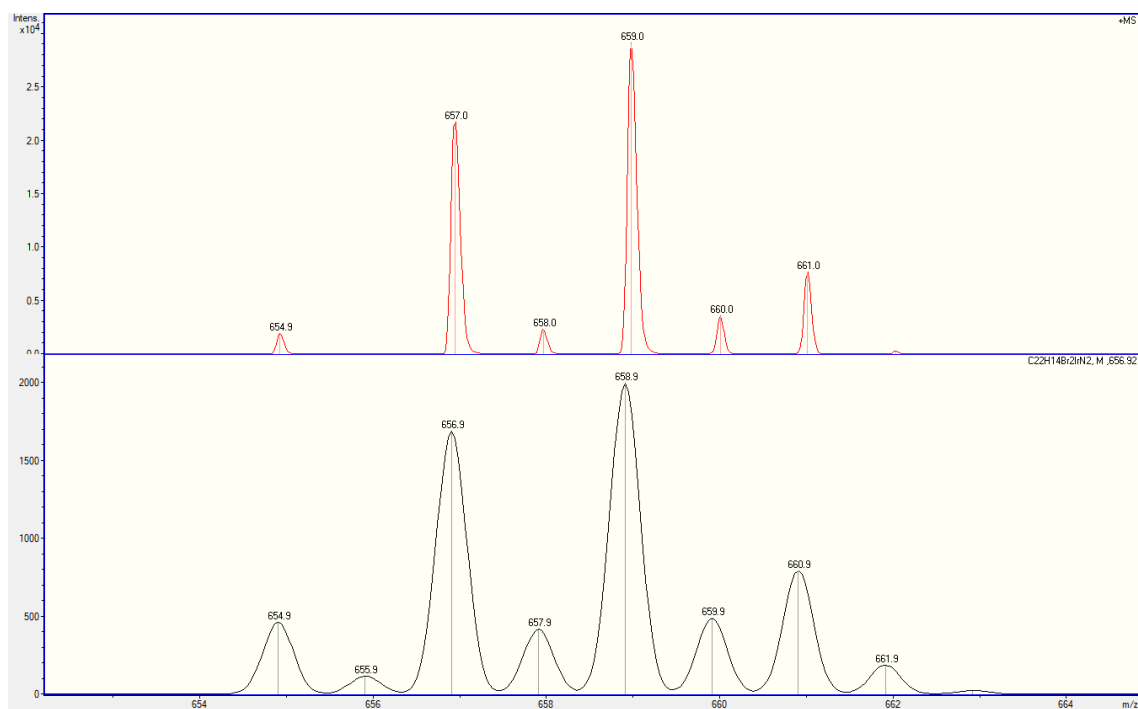

**Figure S4.** MALDI-TOF of complex  $(\eta^2\text{-C}_8\text{H}_{14})_2\text{Ir}(\mu\text{-Cl})_2\text{Ir}\{\kappa^2\text{-C},N\text{-[C}_6\text{BrH}_3\text{-py]}\}_2$  (**3**).

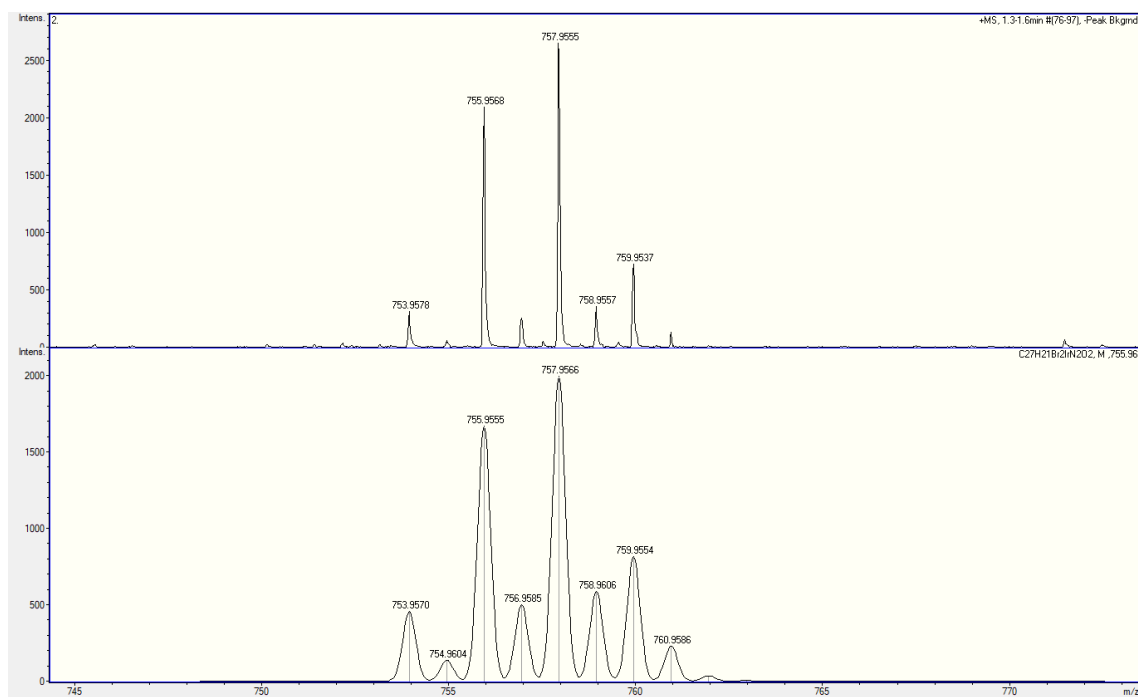

**Figure S5.** MALDI-TOF of complex  $\text{Ir}(\text{acac})\{\kappa^2\text{-C},N\text{-[C}_6\text{BrH}_3\text{-py]}\}_2$  (**5**)

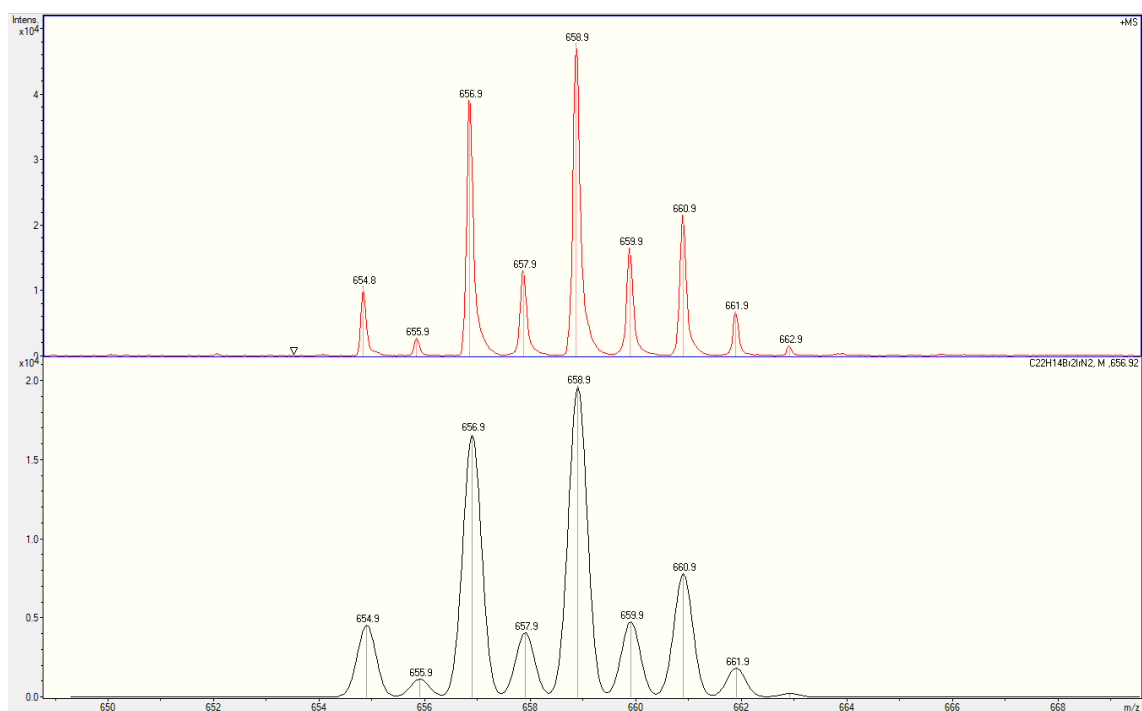

**Figure S6.** MALDI-TOF of  $\text{Ir}\{\kappa^2\text{-C,N-[C}_6\text{BrH}_3\text{-py]}\}_2$  fragment.

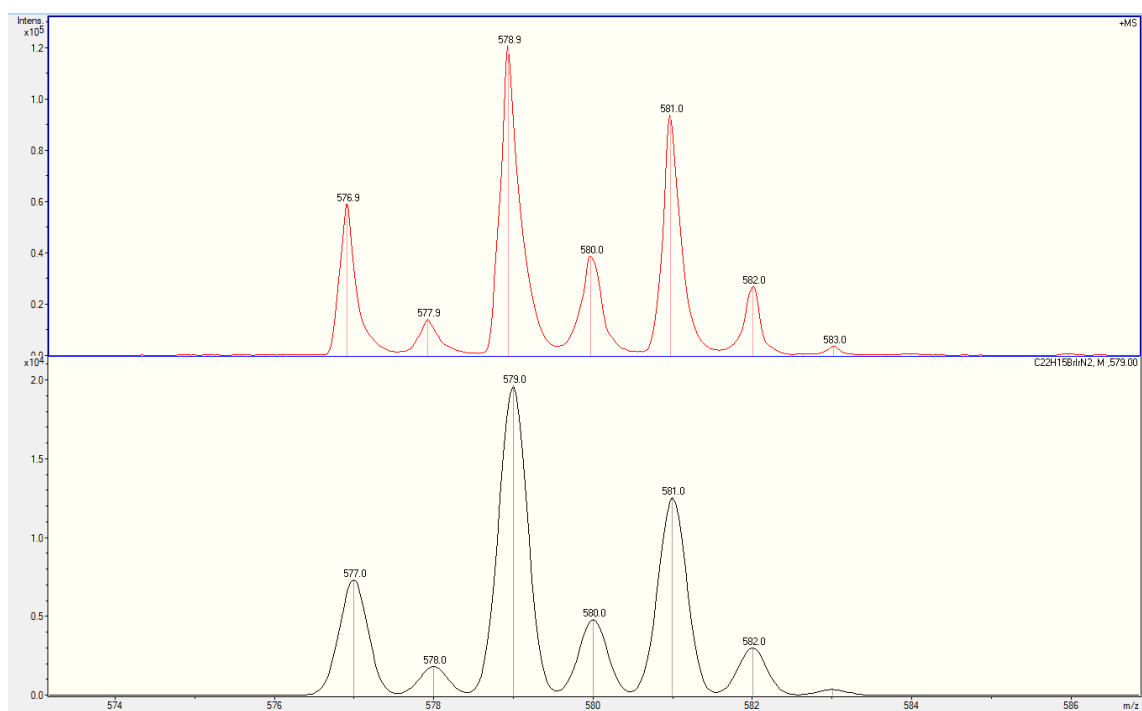

**Figure S7.** MALDI-TOF of  $\text{Ir}\{\kappa^2\text{-C,N-[C}_6\text{BrH}_3\text{-py]}\}\{\kappa^2\text{-C,N-[C}_6\text{H}_4\text{-py]}\}$  fragment.

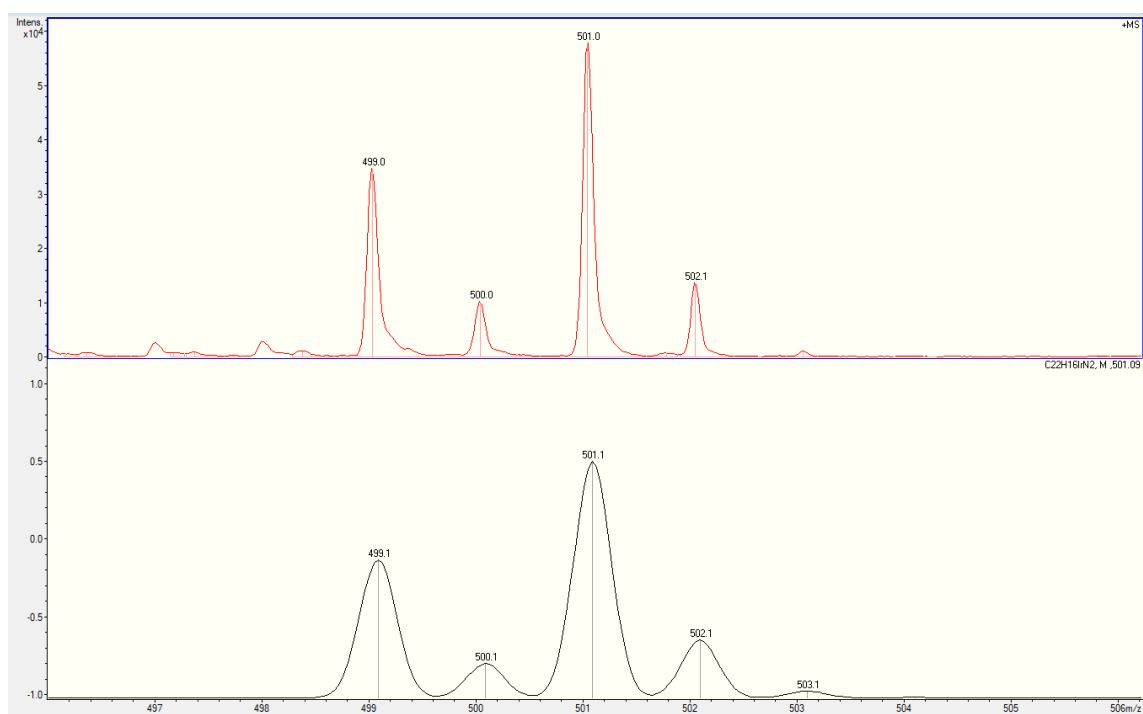

**Figure S8.** MALDI-TOF of Ir{κ²-C,N-[C₆H₄-py]}₂ fragment.

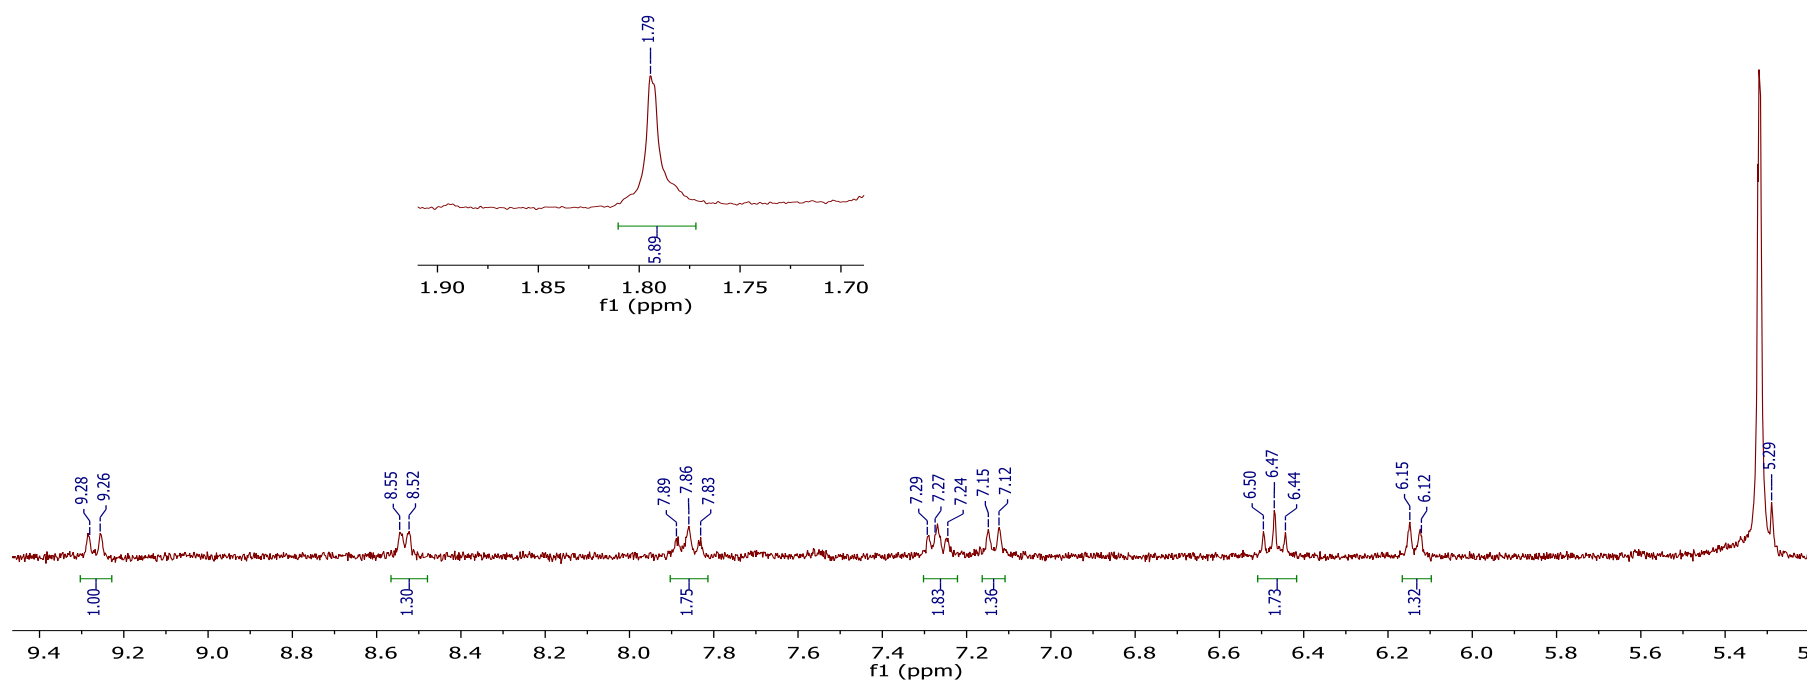

**Figure S9.**  $^1\text{H}$ -NMR (300 MHz,  $\text{CD}_2\text{Cl}_2$ , 298 K) spectra of  $\text{Ir}(\text{acac})\{\kappa^2\text{-C,N-[C}_6\text{BrH}_3\text{-py]}\}_2$  (**5**)

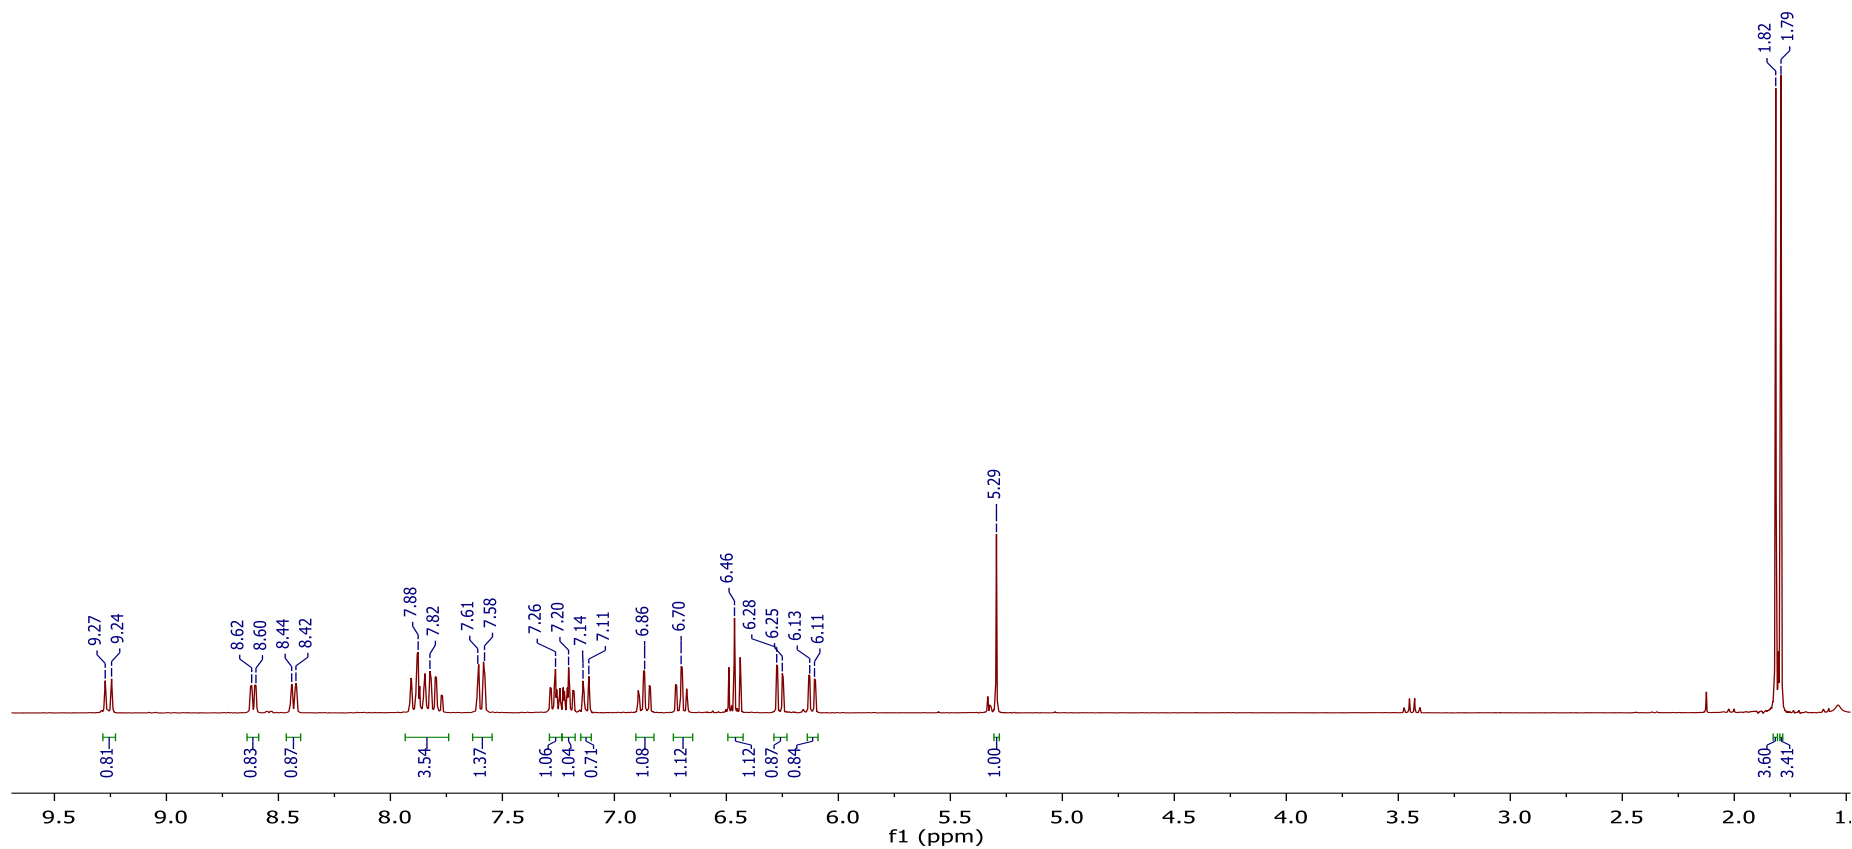

**Figure S10.** <sup>1</sup>H-NMR (300 MHz, CD<sub>2</sub>Cl<sub>2</sub>, 298 K) of Ir(acac){κ<sup>2</sup>-C,N-[C<sub>6</sub>BrH<sub>3</sub>-py]}{κ<sup>2</sup>-C,N-[C<sub>6</sub>H<sub>4</sub>-py]} (6)

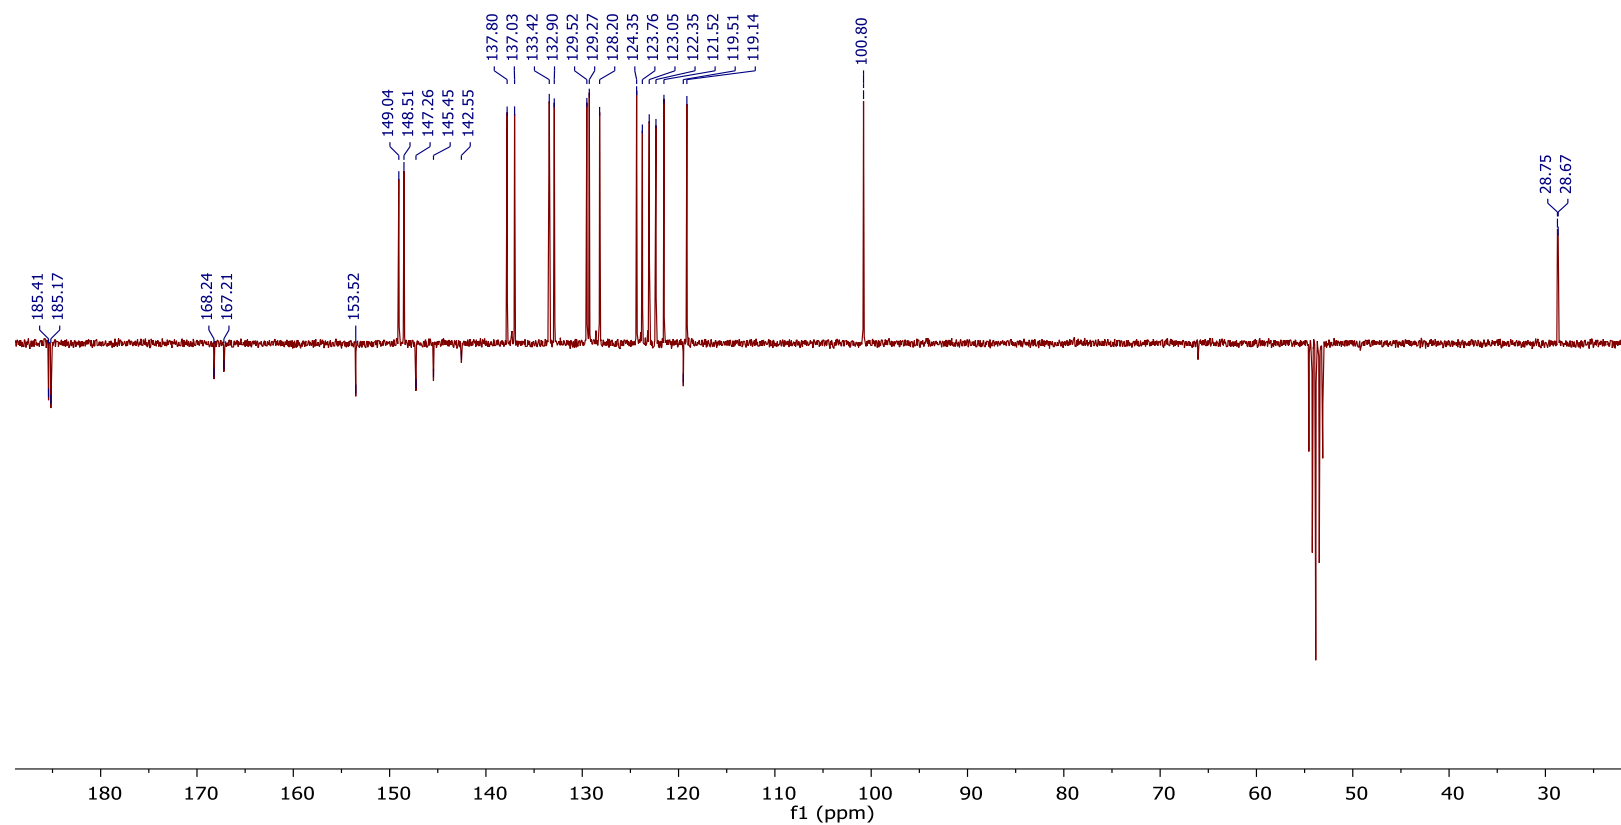

**Figure S11.**  $^{13}\text{C}\{^1\text{H}\}$  APT NMR (75 MHz,  $\text{CD}_2\text{Cl}_2$ , 298 K) of  $\text{Ir}(\text{acac})\{\kappa^2\text{-C,N-[C}_6\text{BrH}_3\text{-py}]\}\{\kappa^2\text{-C,N-[C}_6\text{H}_4\text{-py}]\}$  (**6**)

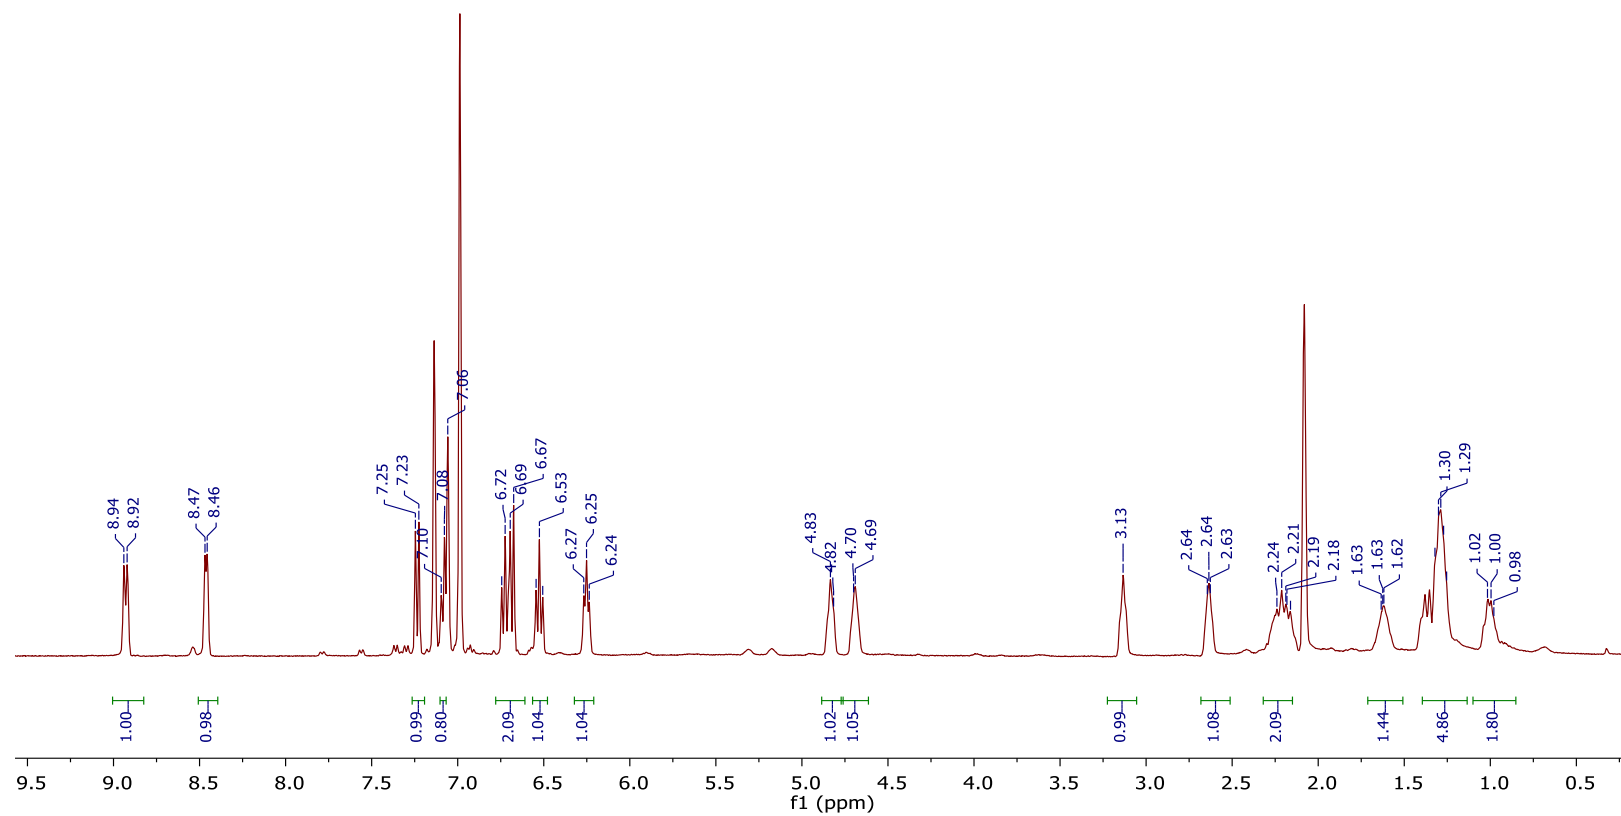

**Figure S12.**  $^1\text{H}$ -NMR (400 MHz,  $\text{tol-}d_8$ , 223K) for  $\text{IrCl}(\eta^4\text{-C}_8\text{H}_{12})\{\kappa^1\text{-N-[py-C}_6\text{BrH]}\}$  (**8**).

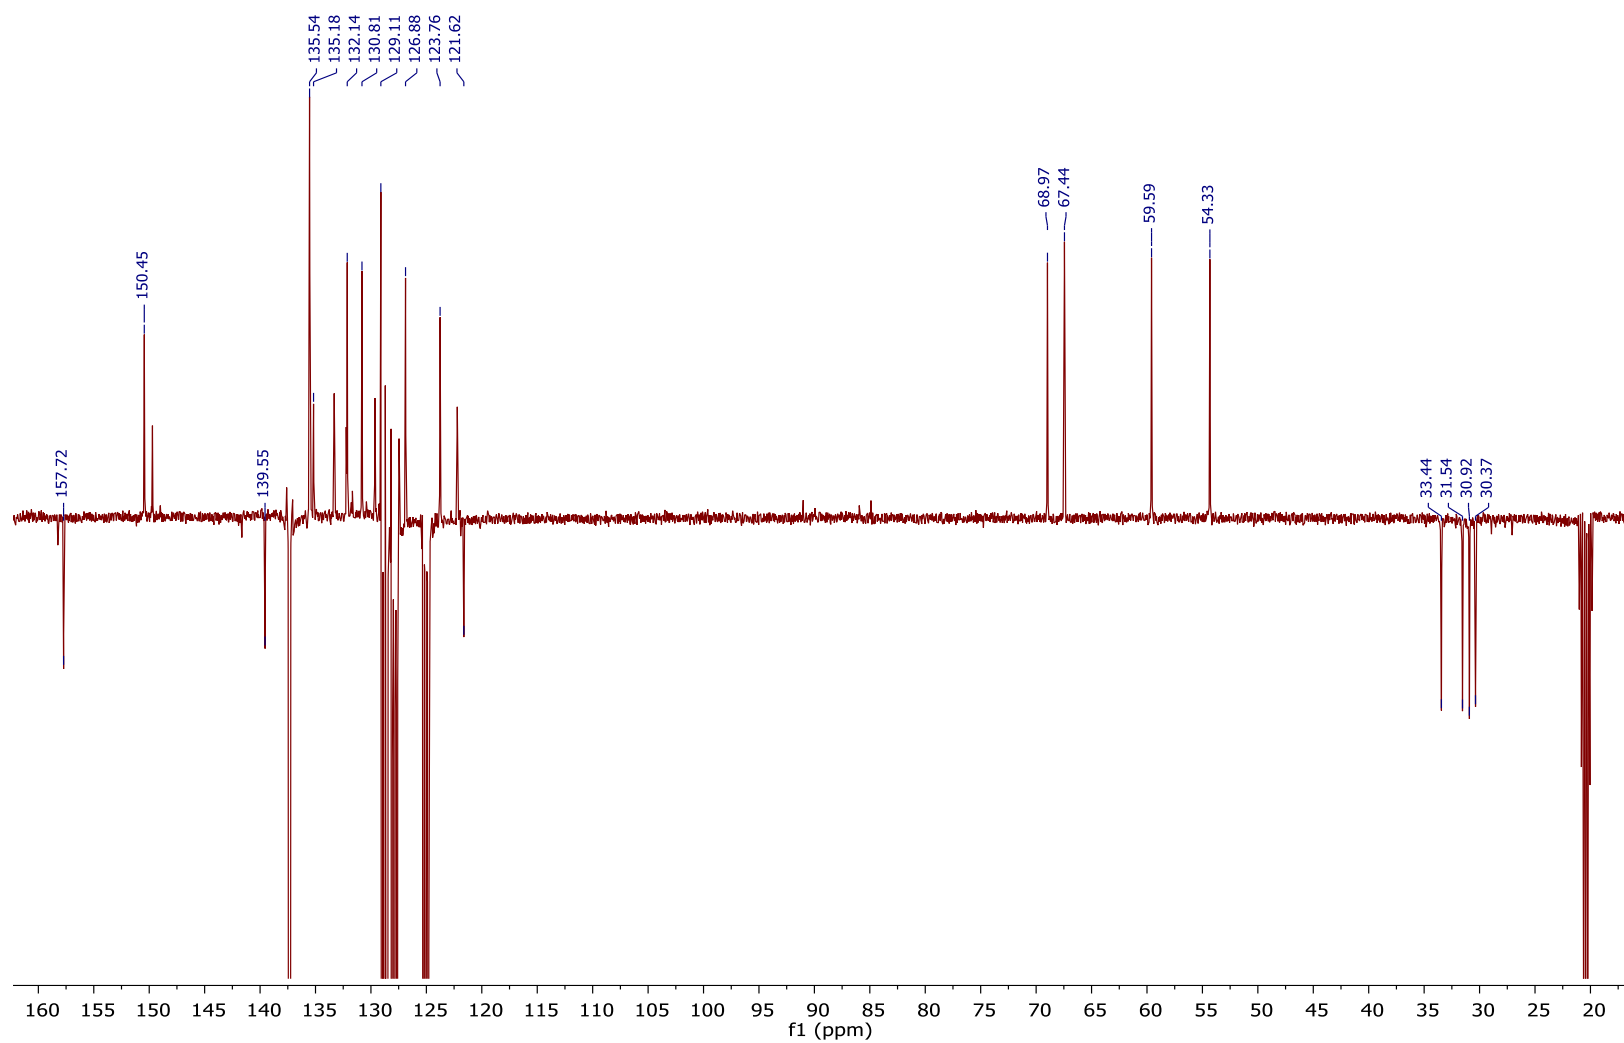

**Figure S13.**  $^{13}\text{C}\{^1\text{H}\}$  APT NMR (100 MHz,  $\text{tol-}d_8$ , 223K) for  $\text{IrCl}(\eta^4\text{-C}_8\text{H}_{12})\{\kappa^1\text{-N-[py-C}_6\text{BrH]}\}$  (**8**).

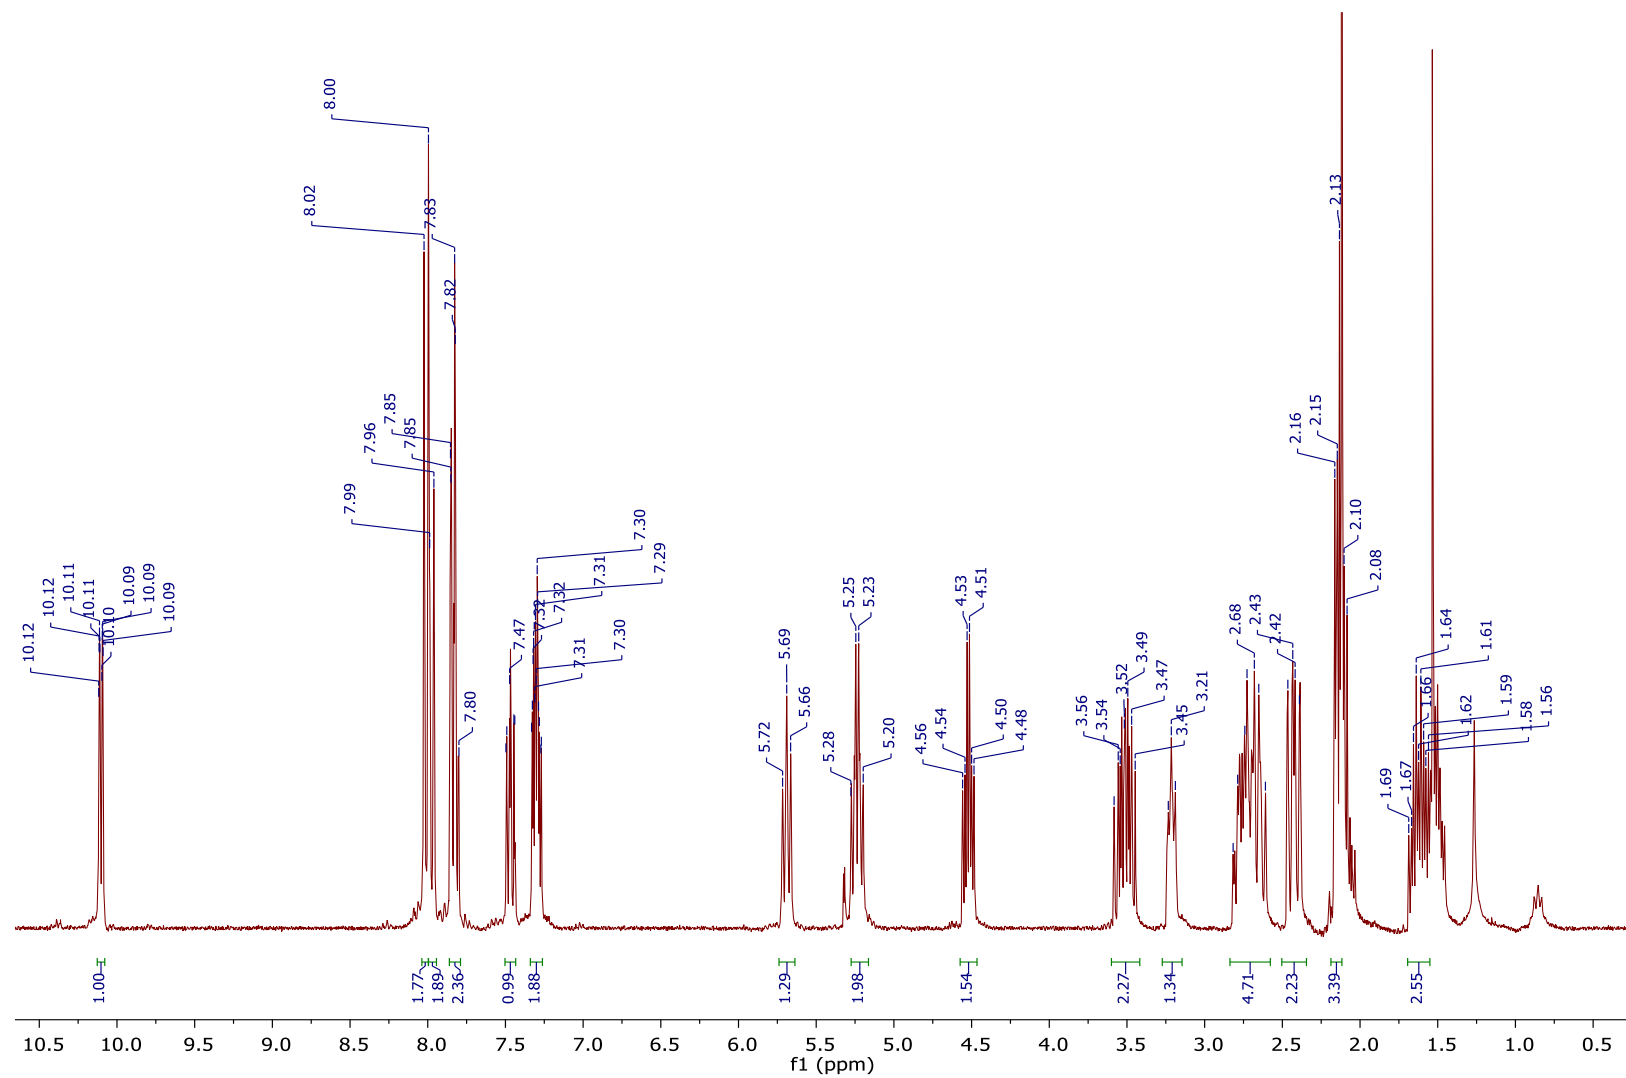

**Figure S14.** <sup>1</sup>H-NMR (300 MHz, CD<sub>2</sub>Cl<sub>2</sub>, 298 K) of IrClBr{κ<sup>2</sup>-C,N-[C<sub>6</sub>H<sub>4</sub>-py]}(η<sup>4</sup>-C<sub>8</sub>H<sub>12</sub>) (9).

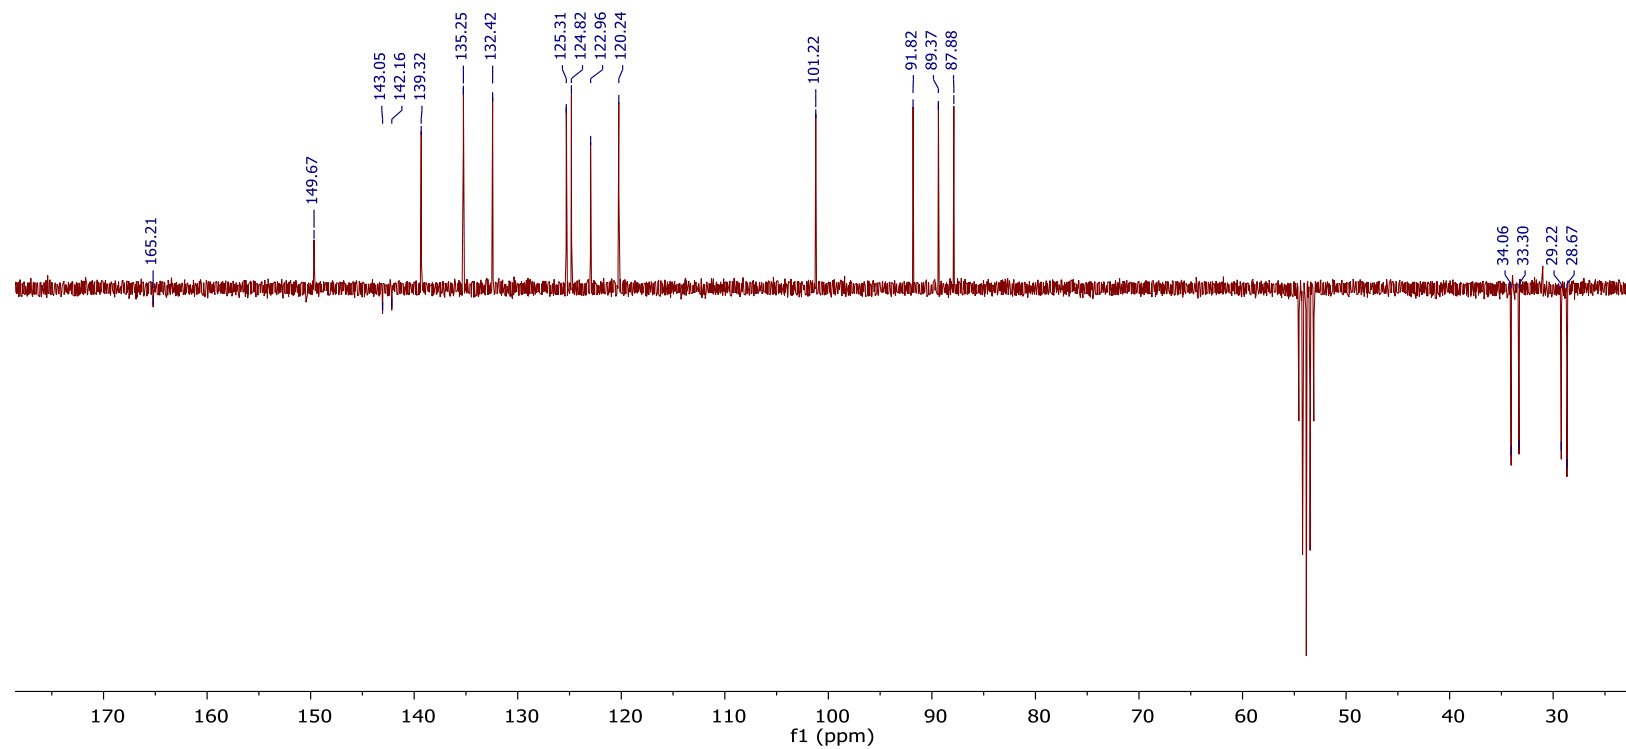

**Figure S15.**  $^{13}\text{C}\{^1\text{H}\}$  APT NMR (75 MHz,  $\text{CD}_2\text{Cl}_2$ , 298 K) for  $\text{IrClBr}\{\kappa^2\text{-C,N-[C}_6\text{H}_4\text{-py]}\}(\eta^4\text{-C}_8\text{H}_{12})$  (**9**).

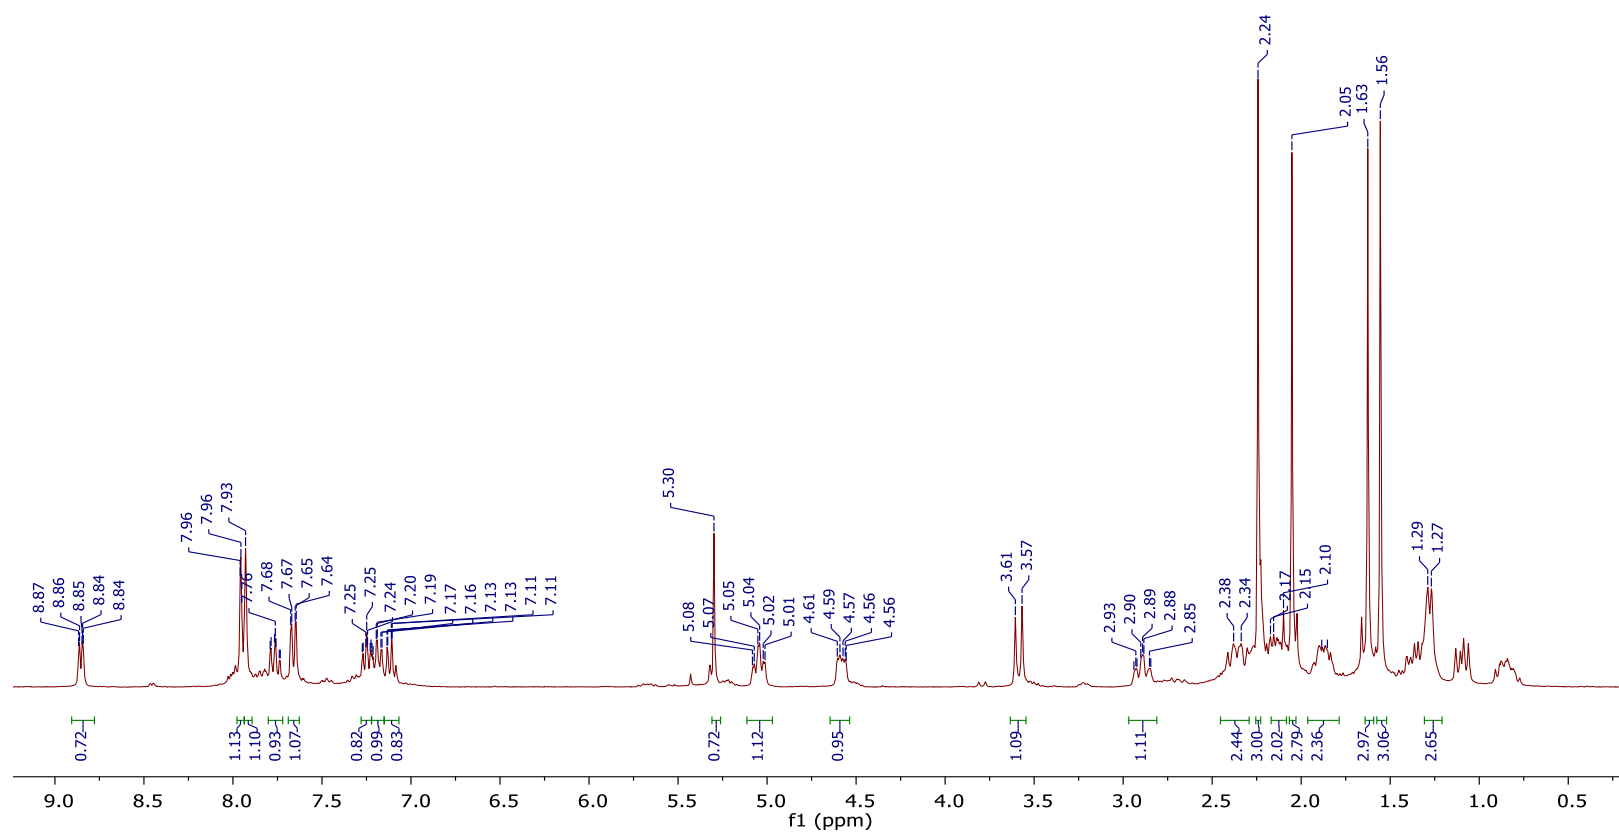

**Figure S16.** <sup>1</sup>H-NMR (300 MHz, CD<sub>2</sub>Cl<sub>2</sub>, 298 K) for Ir(acac){κ<sup>2</sup>-C,N-[C<sub>6</sub>H<sub>4</sub>-py]}{κ<sup>1</sup>-C, η<sup>2</sup>-[C<sub>8</sub>H<sub>12</sub>-(C<sup>3</sup>-acac)]} (**10**)

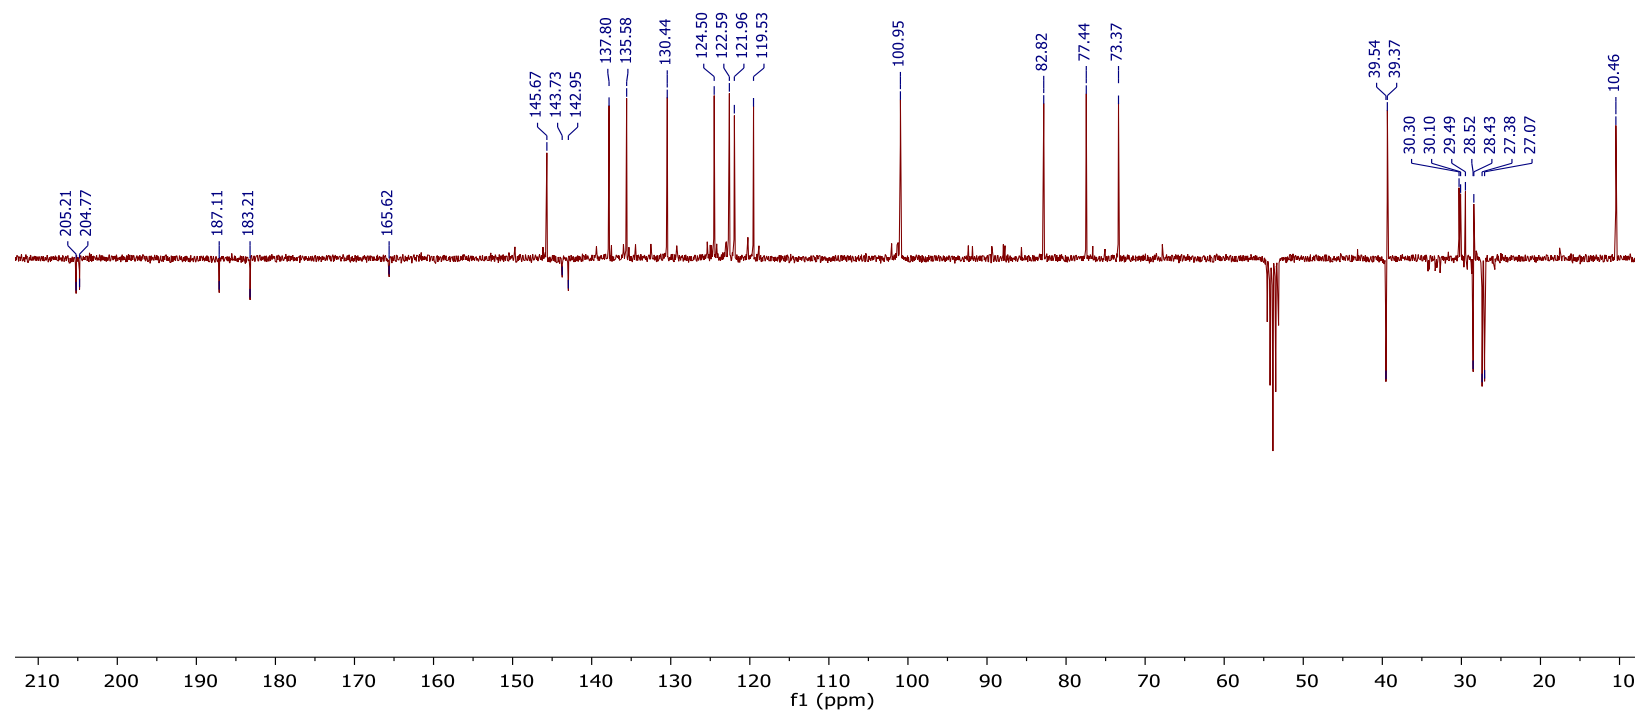

**Figure S17.** <sup>13</sup>C{<sup>1</sup>H} APT NMR (75 MHz, CD<sub>2</sub>Cl<sub>2</sub>, 298 K) for Ir(acac){κ<sup>2</sup>-C,N-[C<sub>6</sub>H<sub>4</sub>-py]}{κ<sup>1</sup>-C, η<sup>2</sup>-[C<sub>8</sub>H<sub>12</sub>-(C<sup>3</sup>-acac)]} (**10**).

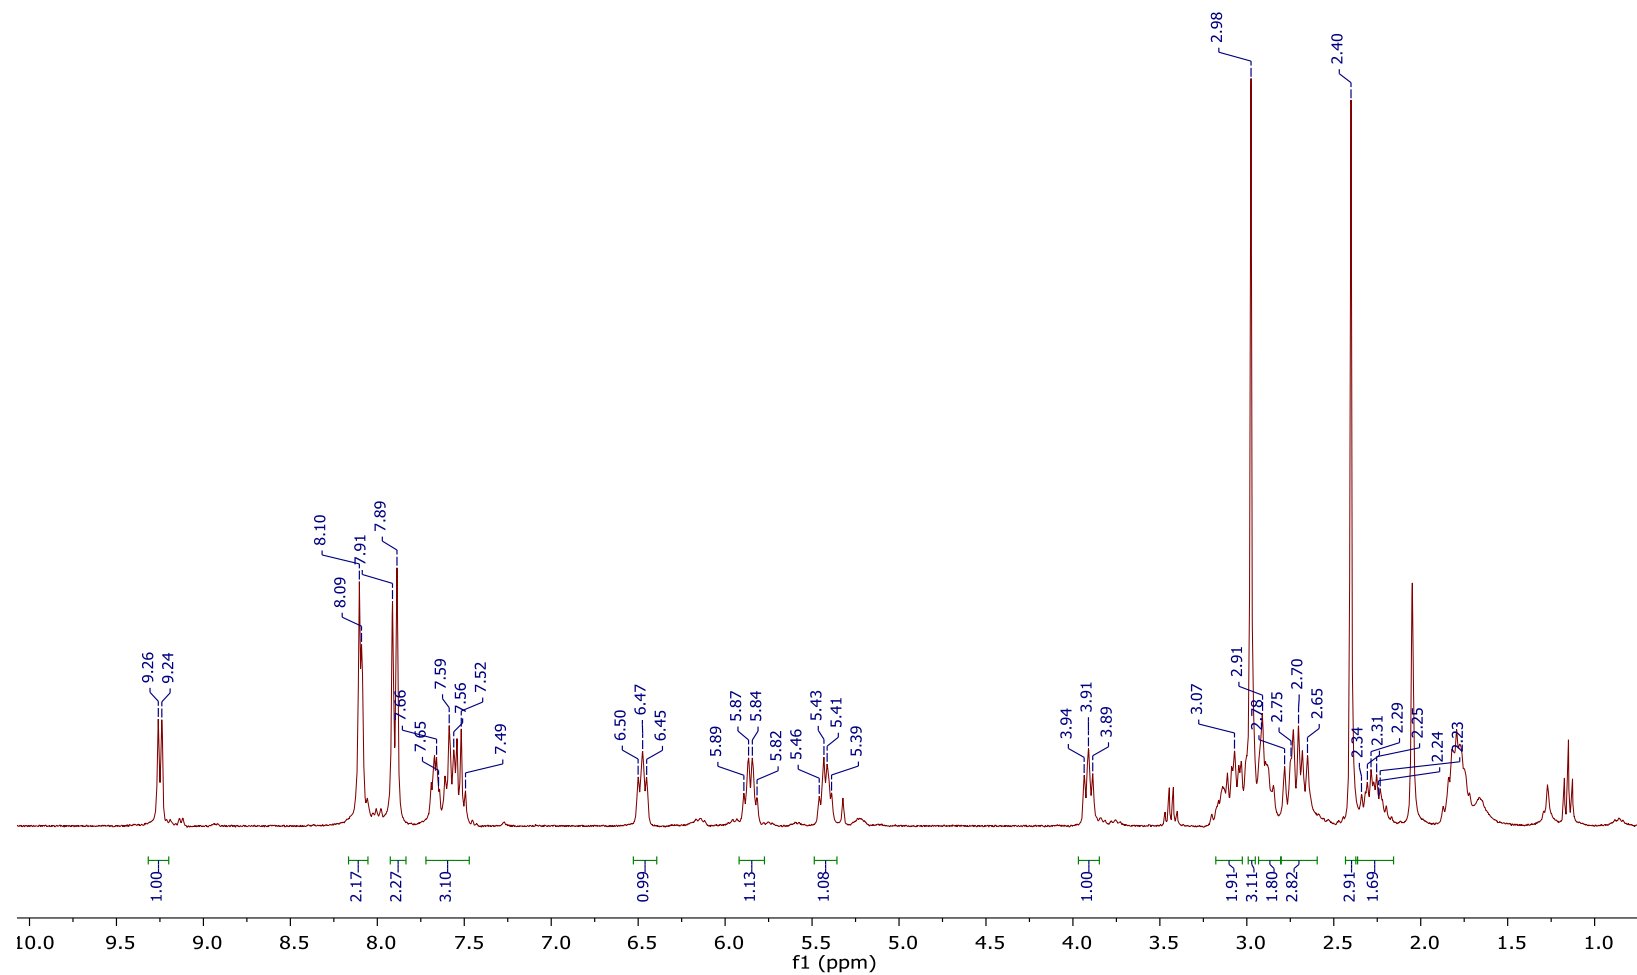

**Figure S18.**  $^1\text{H}$ -NMR (300 MHz,  $\text{CD}_2\text{Cl}_2$ , 298 K) for  $[\text{Ir}\{\kappa^2\text{-C,N-[C}_6\text{H}_4\text{-py]}\}](\eta^4\text{-C}_8\text{H}_{12})(\text{CH}_3\text{CN})_2(\text{BF}_4)_2$  (**11**)

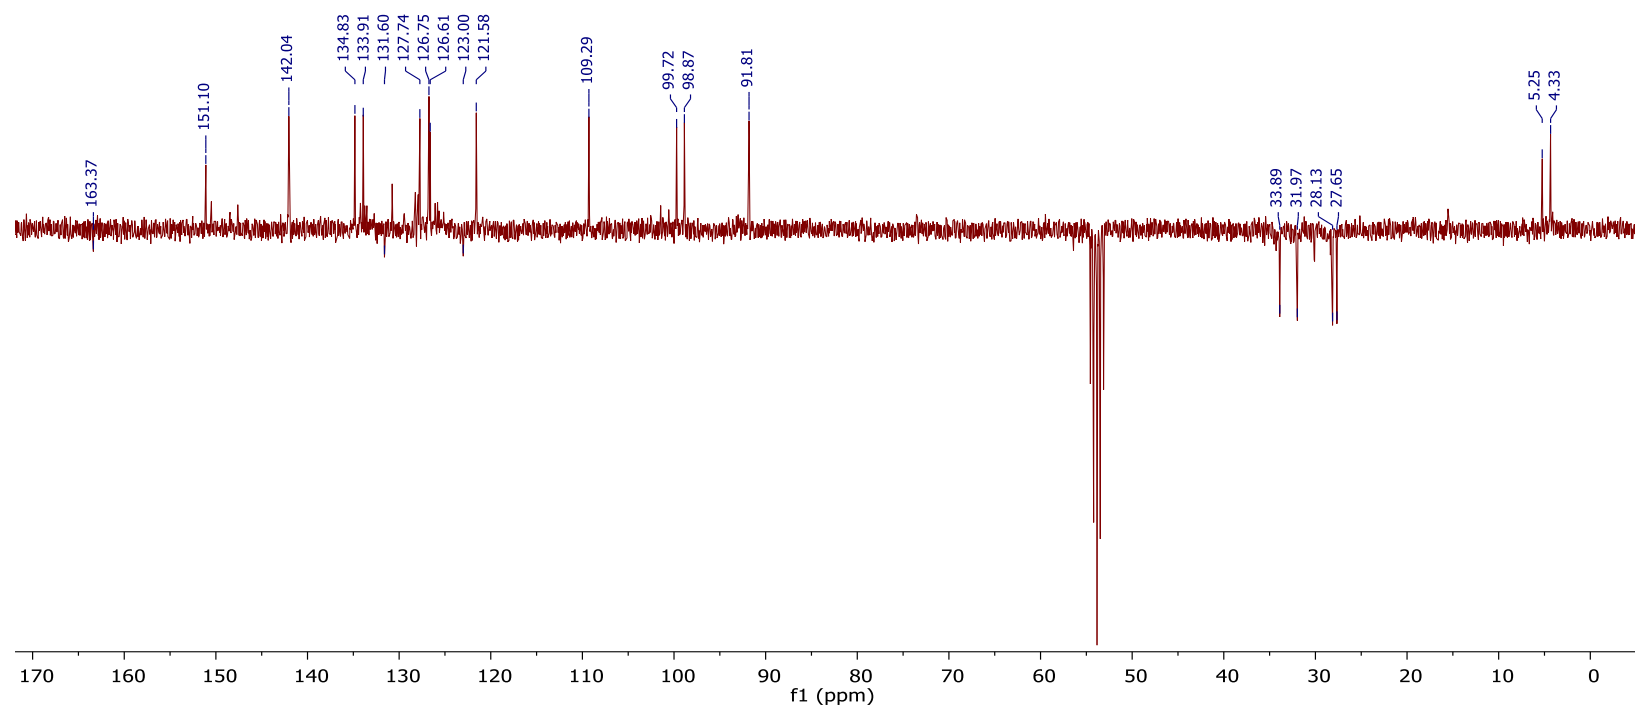

**Figure S19.**  $^{13}\text{C}\{^1\text{H}\}$  APT NMR (75 MHz,  $\text{CD}_2\text{Cl}_2$ , 298 K) for  $[\text{Ir}\{\kappa^2\text{-C},N\text{-}[\text{C}_6\text{H}_4\text{-py}]\}\{\eta^4\text{-C}_8\text{H}_{12}\}(\text{CH}_3\text{CN})_2](\text{BF}_4)_2$  (**11**)

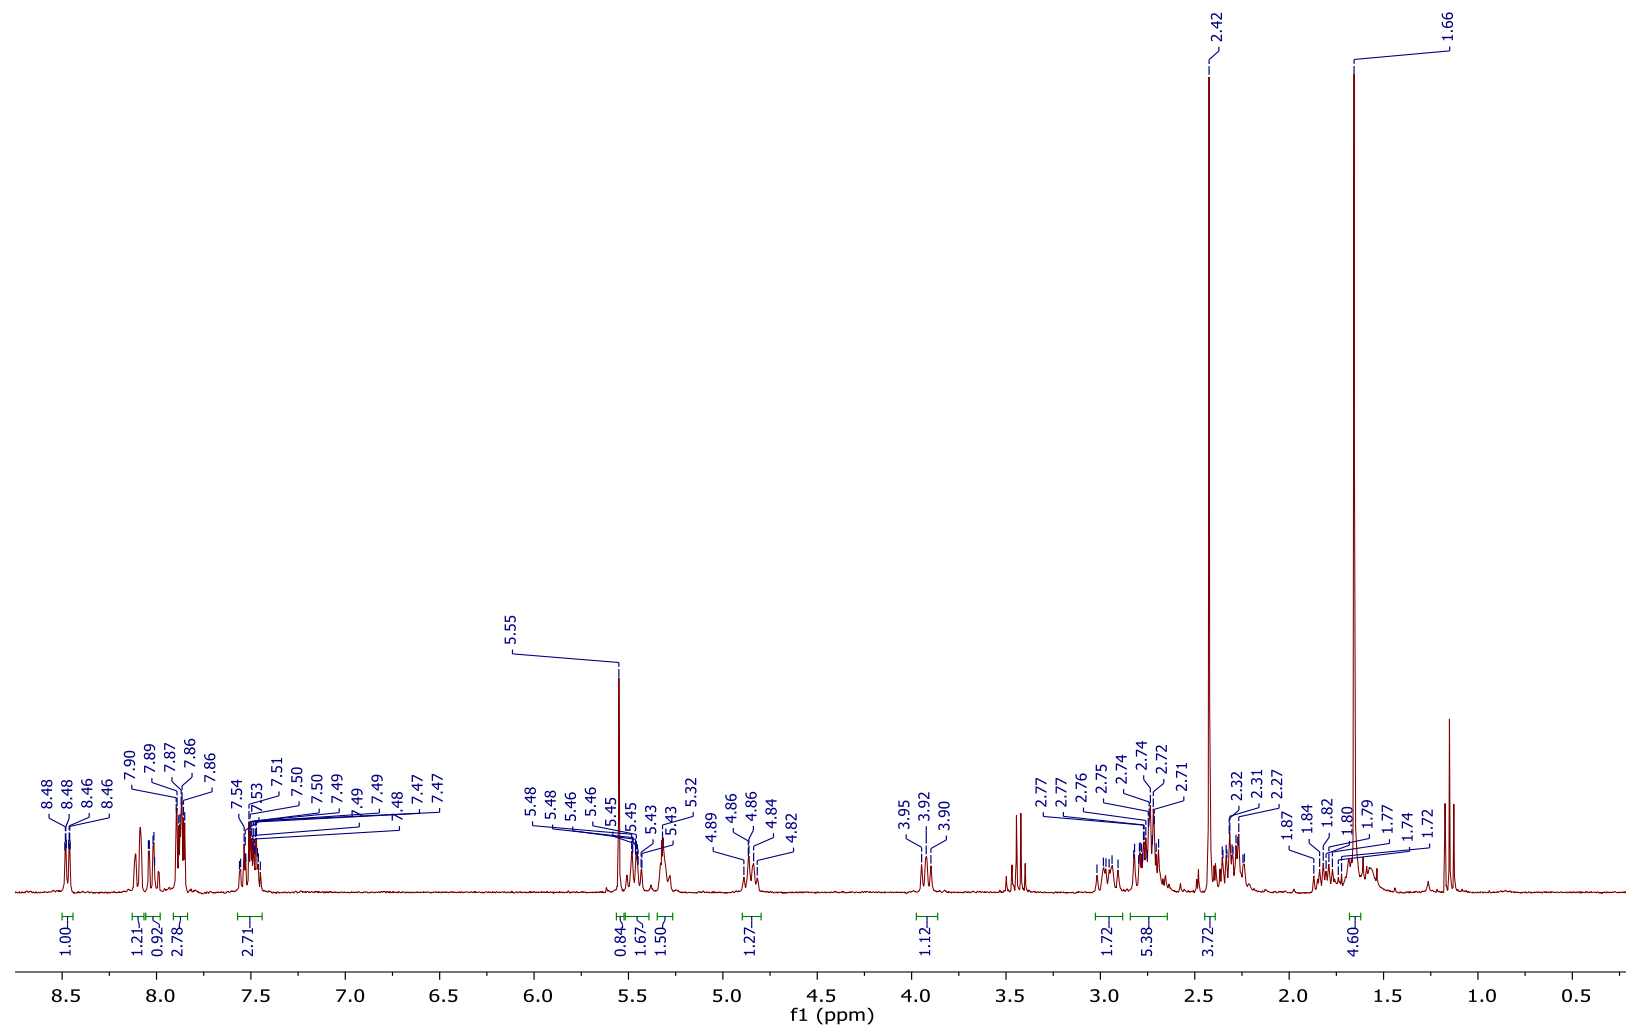

**Figure S20.**  $^1\text{H}$ -NMR (300 MHz,  $\text{CD}_2\text{Cl}_2$ , 298 K) for  $[\text{Ir}(\text{acac})\{\kappa^2\text{-C,N-[C}_6\text{H}_4\text{-py]}\}(\eta^4\text{-C}_8\text{H}_{12})]\text{BF}_4$  (**12**).

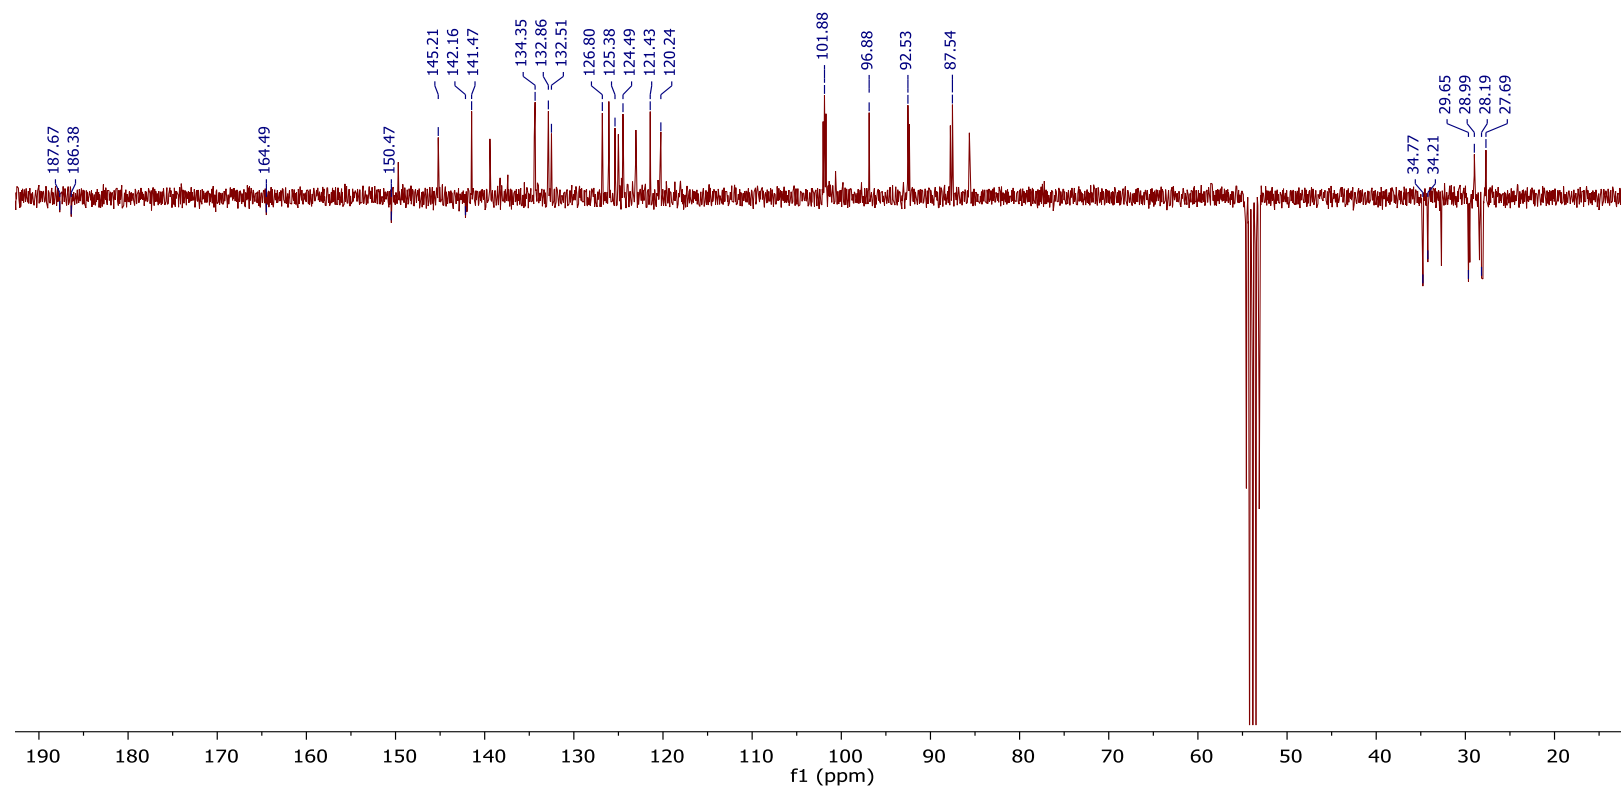

**Figure S21.**  $^{13}\text{C}\{^1\text{H}\}$  APT NMR (75 MHz,  $\text{CD}_2\text{Cl}_2$ , 298 K) for  $[\text{Ir}(\text{acac})\{\kappa^2\text{-C},N\text{-}[\text{C}_6\text{H}_4\text{-py}]\}\{\eta^4\text{-C}_8\text{H}_{12}\}]\text{BF}_4$  (**12**).

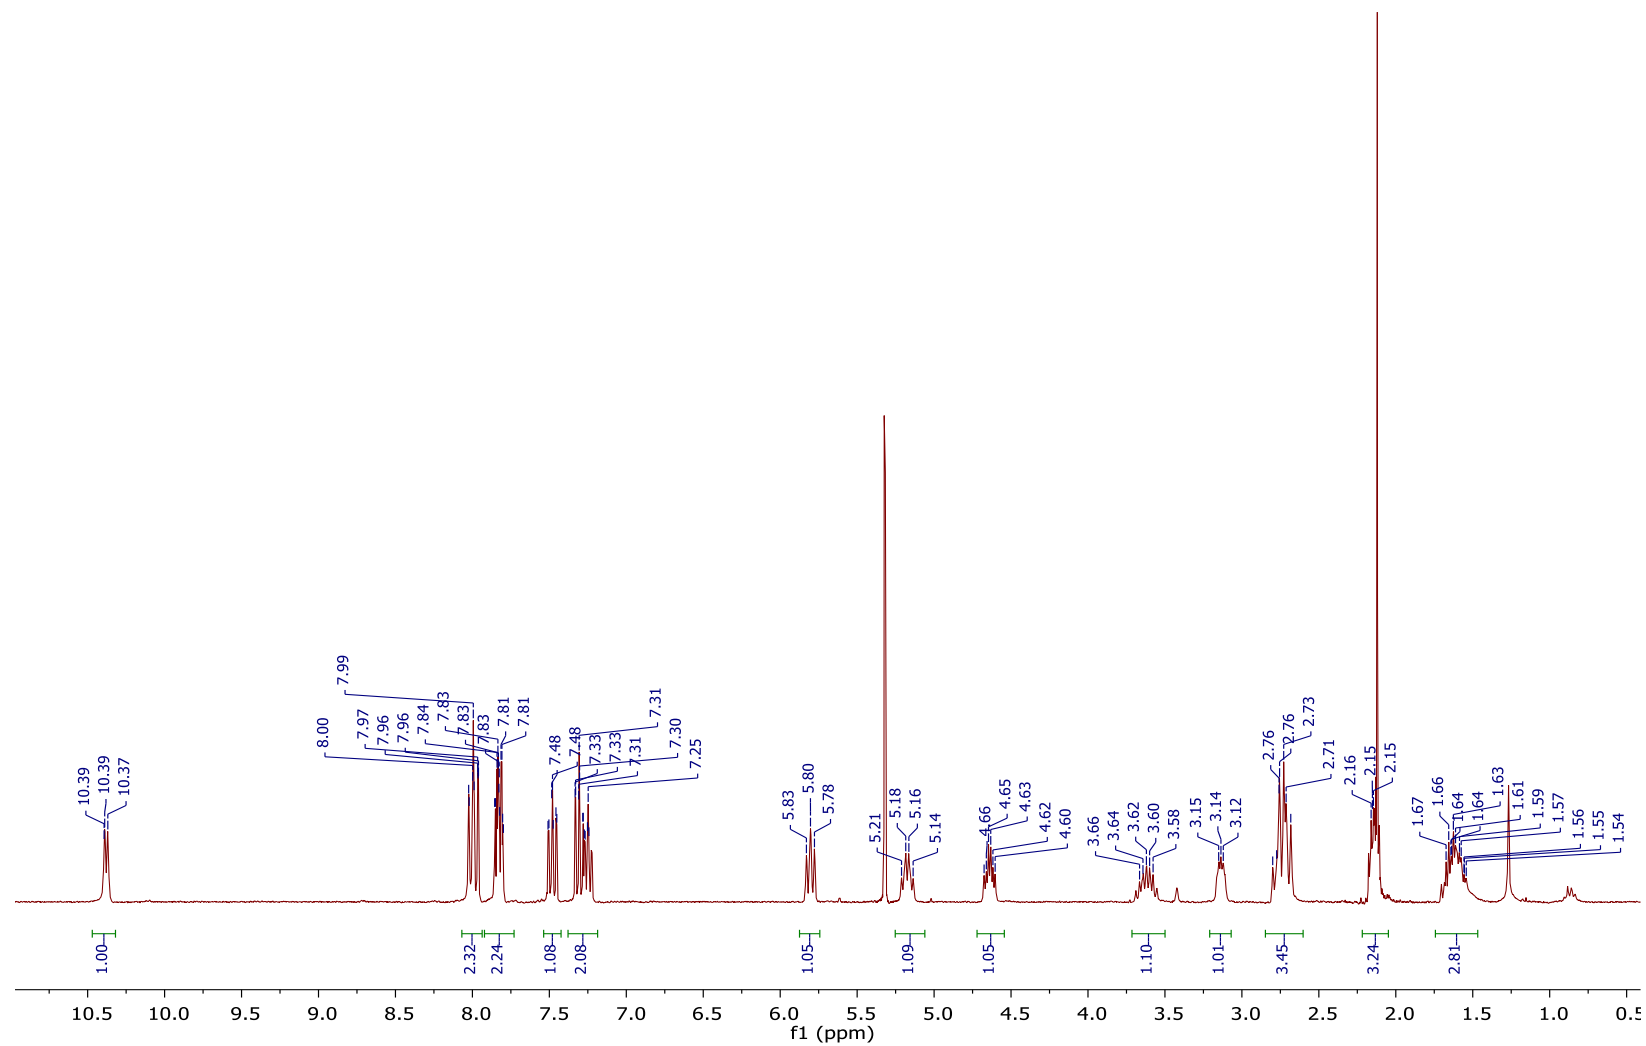

**Figure S22.**  $^1\text{H}$ -NMR (300 MHz,  $\text{CD}_2\text{Cl}_2$ , 298 K) for  $\text{IrBr}_2\{\kappa^2\text{-C,N-[C}_6\text{H}_4\text{-py]}\}(\eta^4\text{-C}_8\text{H}_{12})$  (**13**).

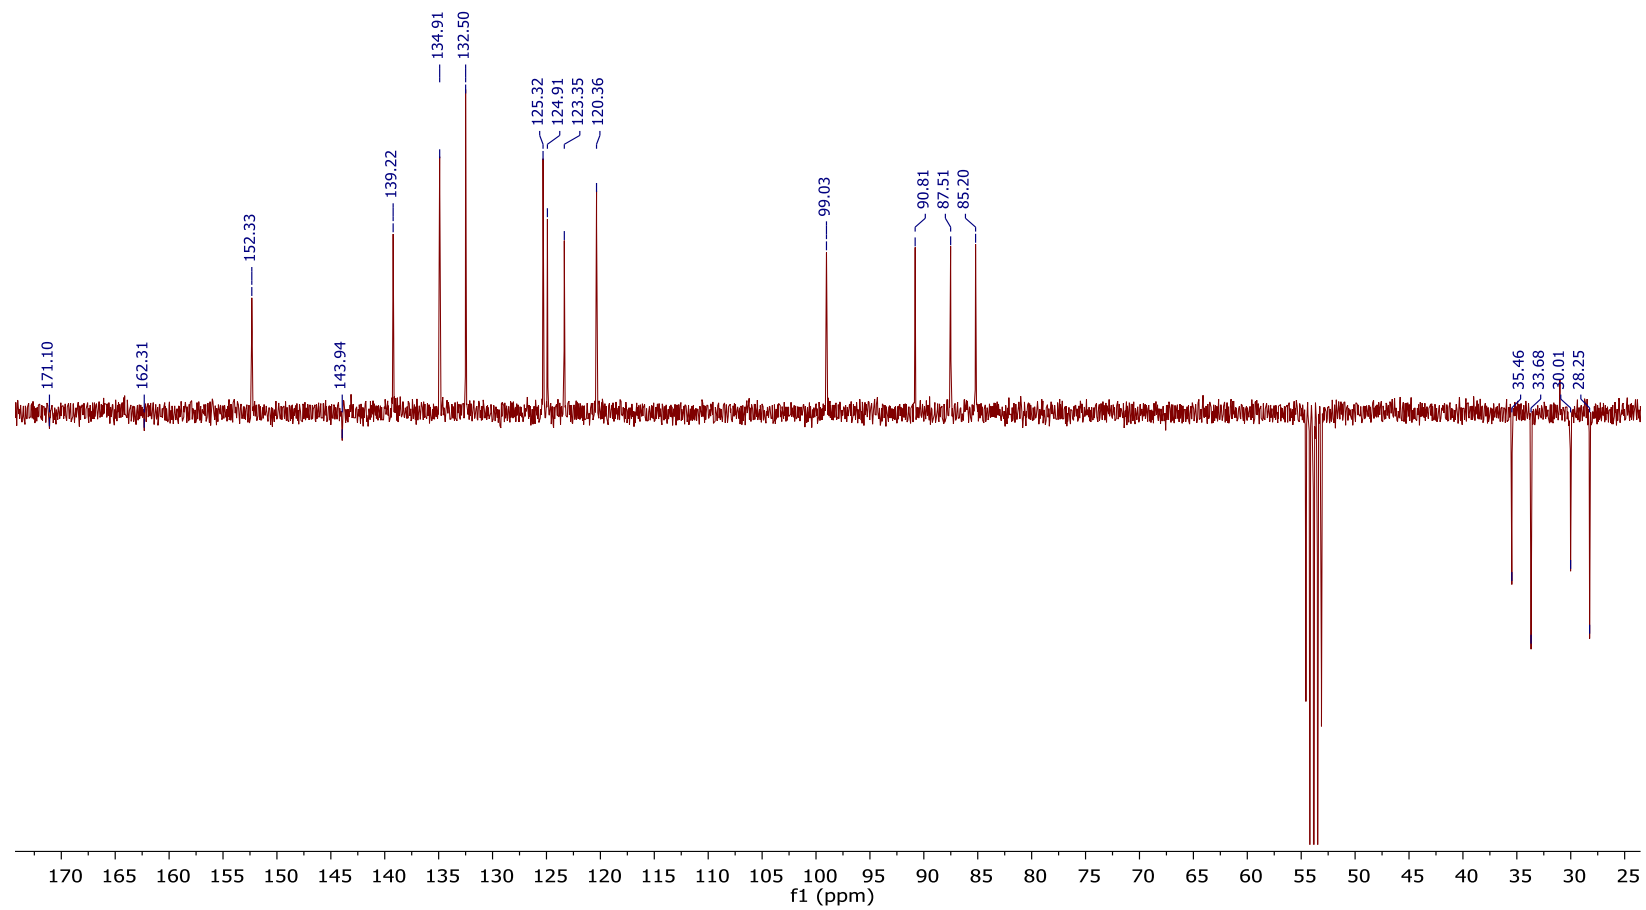

**Figure S23.**  $^{13}\text{C}\{^1\text{H}\}$  APT NMR (75 MHz,  $\text{CD}_2\text{Cl}_2$ , 298 K) for  $\text{IrBr}_2\{\kappa^2\text{-C},N\text{-}[\text{C}_6\text{H}_4\text{-py}]\}(\eta^4\text{-C}_8\text{H}_{12})$  (**13**).

## REFERENCES

- (1) Blessing, R. H. *Acta Crystallogr.* **1995**, *A51*, 33. SADABS: Area-detector absorption correction; Bruker- AXS, Madison, WI, 1996.
- (2) SHELXL-2016/6. Sheldrick, G. M. *Acta Cryst.* **2008**, *A64*, 112-122.
